# Supplementary material for: Prostate cancer histopathology with label-free multispectral deep UV microscopy quantifies phenotypes of tumor grade and aggressiveness
Source: Research Square preprint supplement (doi:10.21203/rs.3.rs-734353/v1), 2021-08-05
Supplement: Supplementary file 1 [file f7e1366d83e09b994a3a41bd.pdf]

**Supplementary Materials for**  
**Prostate cancer histopathology with label-free multispectral deep UV**  
**microscopy quantifies phenotypes of tumor grade and aggressiveness**

Soheil Soltani, Ashkan Ojaghi, Hui Qiao, Nischita Kaza, Xinyang Li, Qionghai Dai,  
Adeboye O Osunkoya, Francisco E Robles\*

\*Corresponding author Email: [robles@gatech.edu](mailto:robles@gatech.edu)

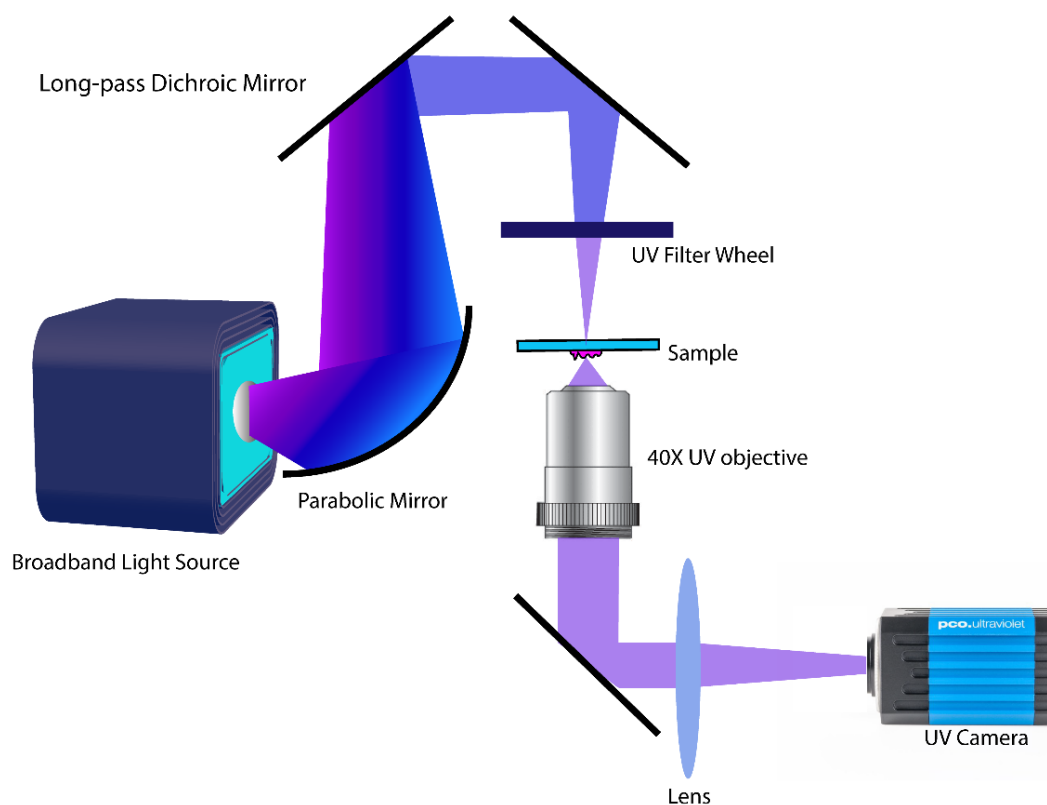

**Fig. S1.** A schematic of the multi-spectral deep UV microscope. The source provides a broadband output beam ( $\sim 200$  nm to 2000 nm) that is focused on the sample using a parabolic mirror. A dichroic mirror is used to only select deep UV region of the spectrum (200-550 nm). The transmitted light is collected using a 40X UV objective and is relayed on the camera using a biconvex lens

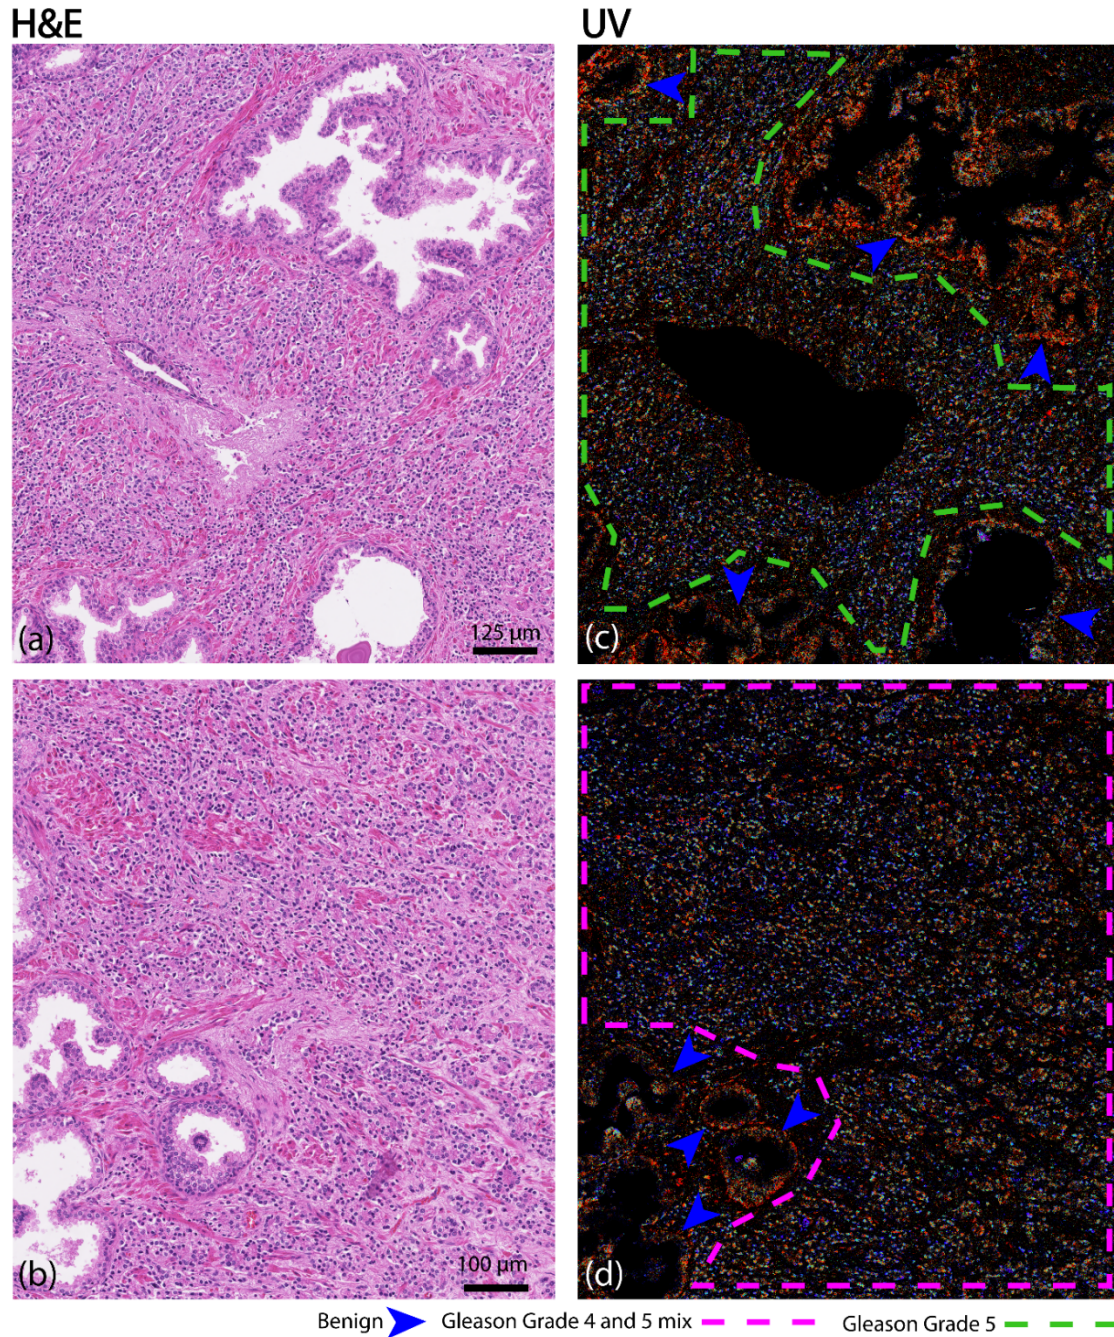

**Fig. S2.** Two examples of prostate cancer regions with aggressive forms of cancer (Gleason Grade 5). It is important to mention that the region in (b) starts from foci of Gleason Grade 4 in the right side of the image and gradually cancer regions with Gleason Grade 5 appear in the top left side of the region (there are not pure Gleason Grade 4 or Gleason Grade 5 regions). Some levels of inflammation are also present.

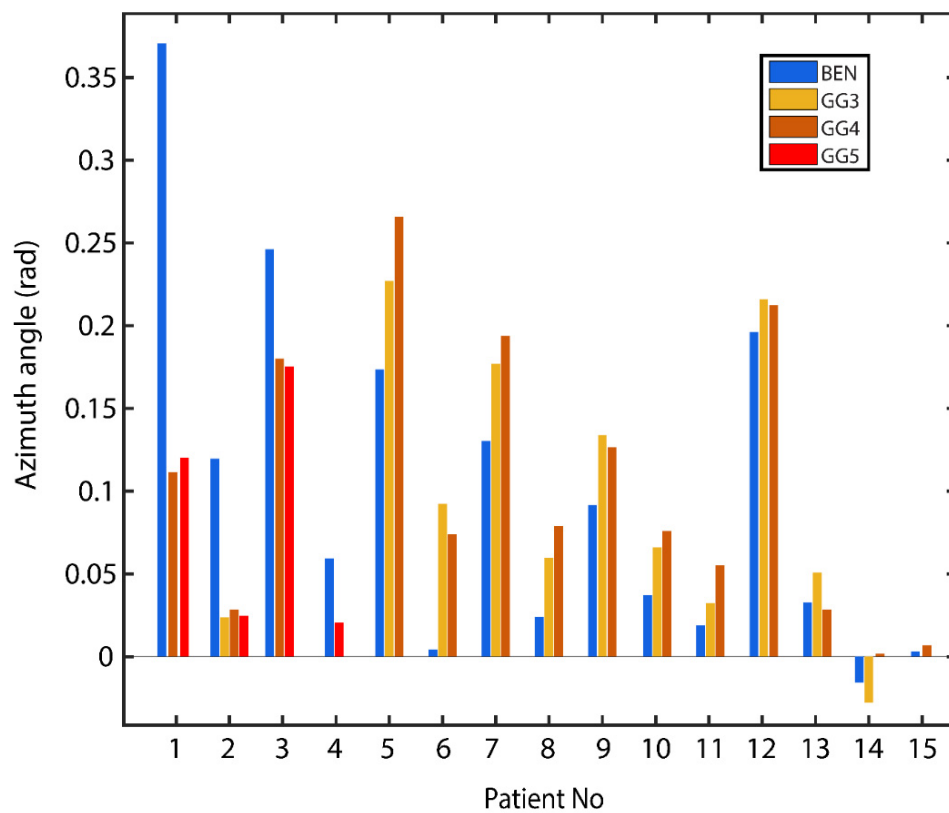

**Fig. S3.** Bar plot of the absolute azimuth angle CoM.
